# Supplementary material
Source: ML conference proceedings conference paper supplement (https://www.ecva.net/papers/eccv_2020/papers_ECCV/html/123630358_ECCV_2020_paper.php)
Supplement: Supplementary file 1 [file 123630358-supp.zip]

# Supplementary Material for Neural Hair Rendering

Anonymous ECCV submission

Paper ID 2985

In this supplementary material, we show more single-image rendering results which are randomly generated from the test set. We organize them in the same order as the result figure (Fig.3) in the main text.

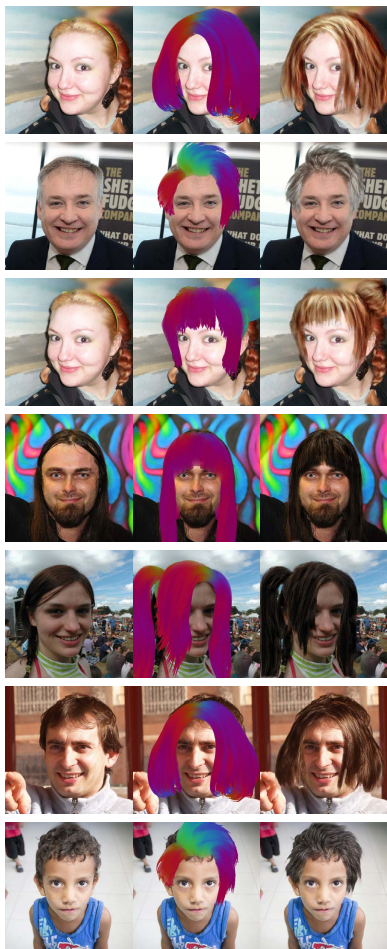

Input      Structure      Result

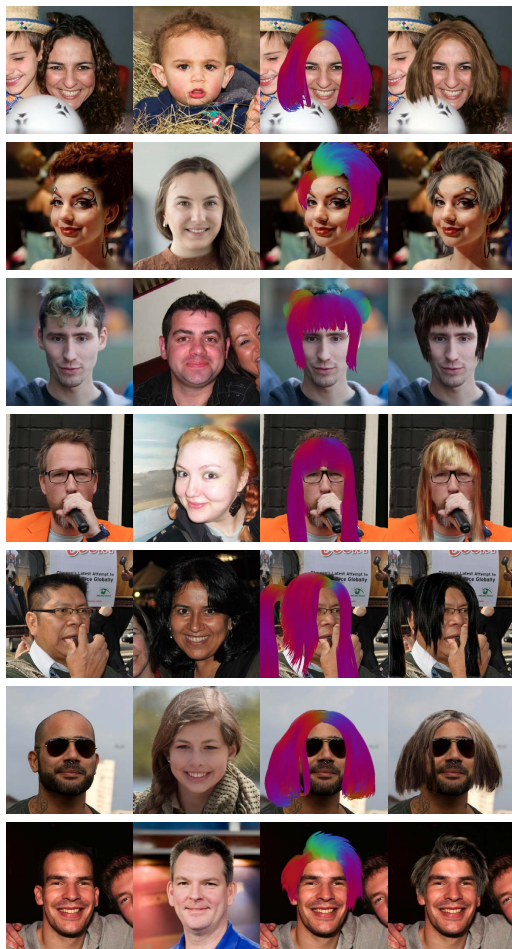

Input      Reference      Structure      Result

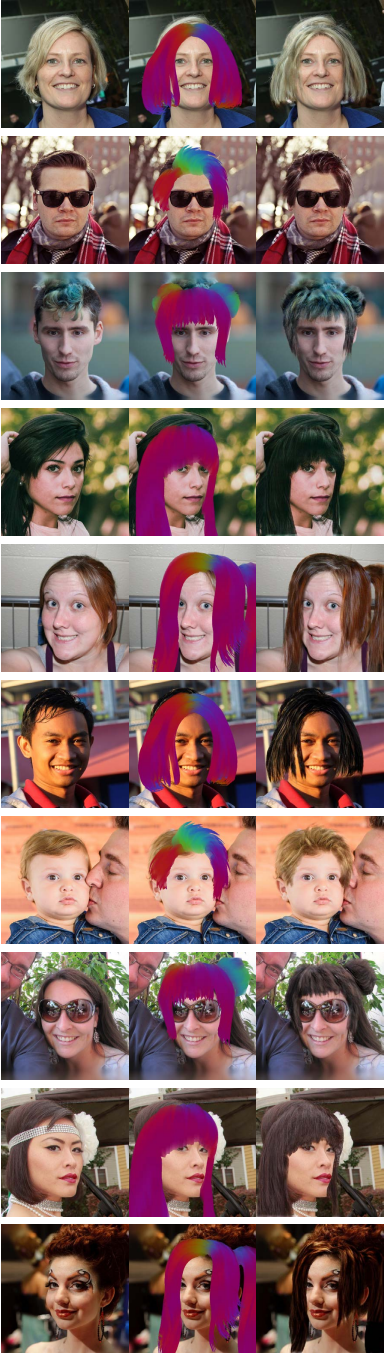

Input Structure Result

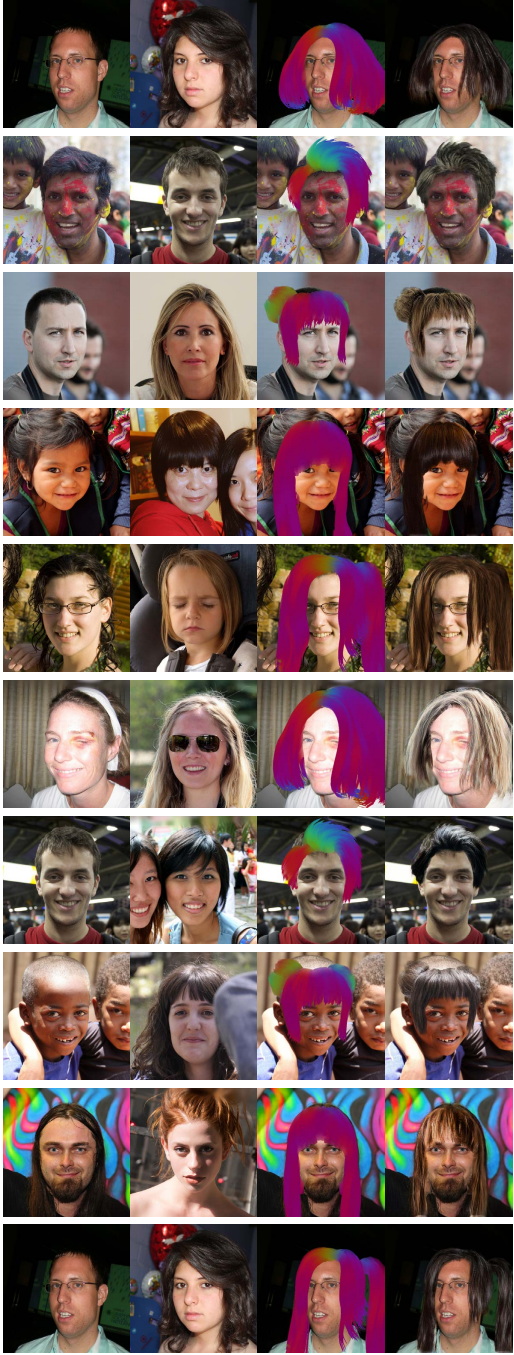

Input Reference Structure Result



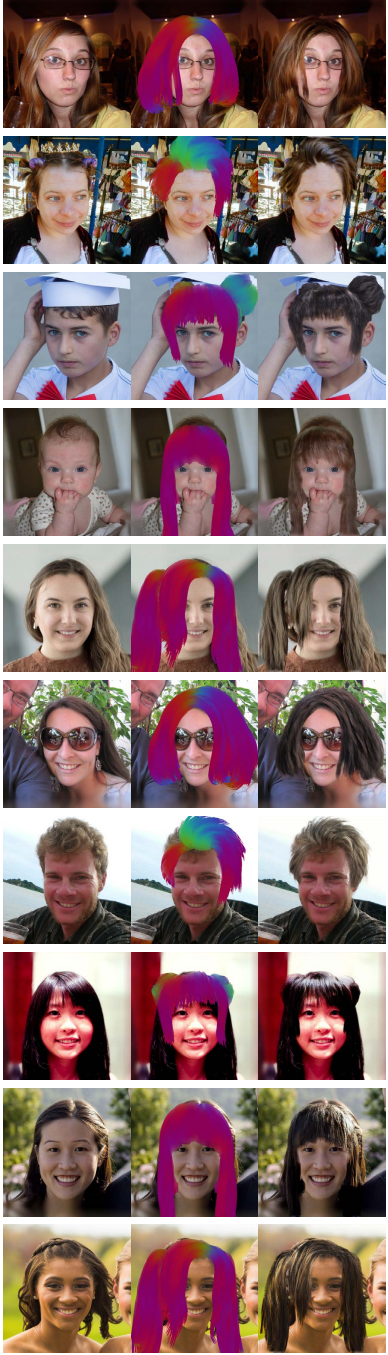

Input      Structure      Result

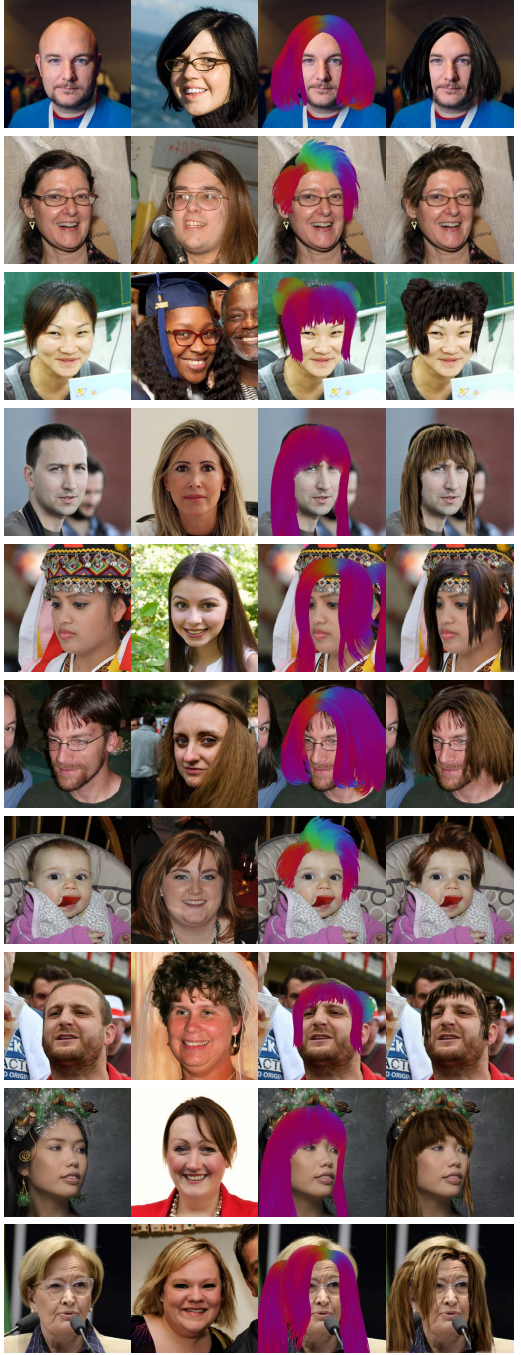

Input      Reference      Structure      Result

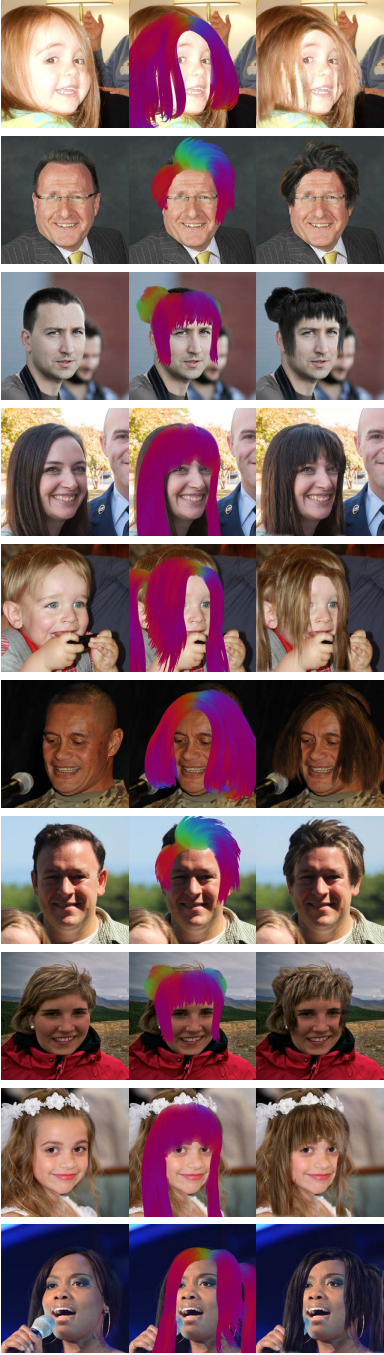

Input      Structure      Result

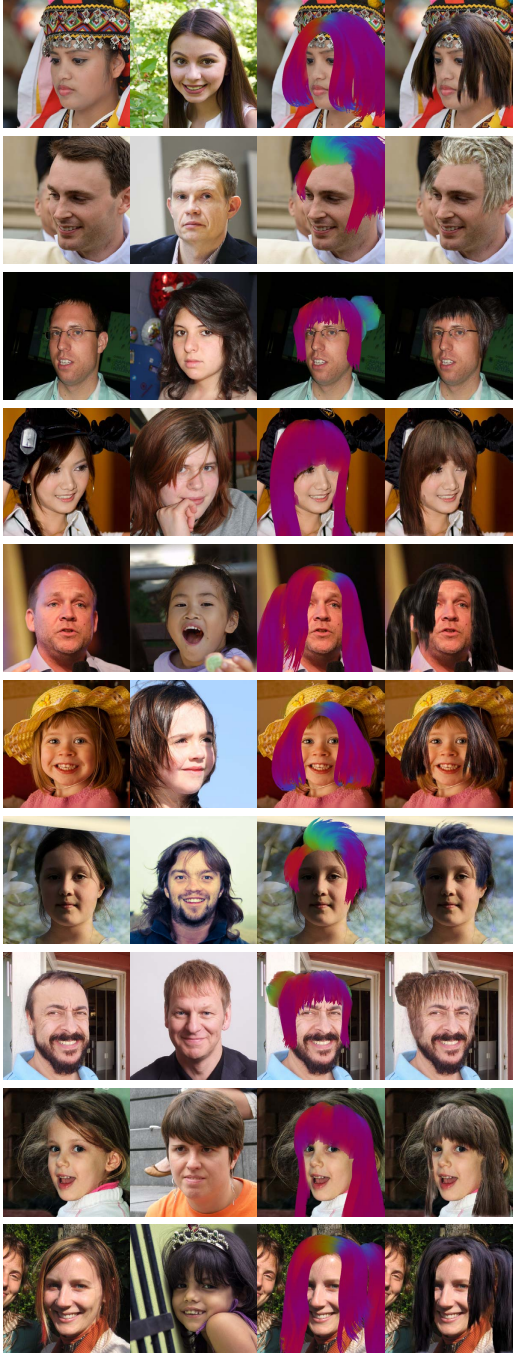

Input      Reference      Structure      Result



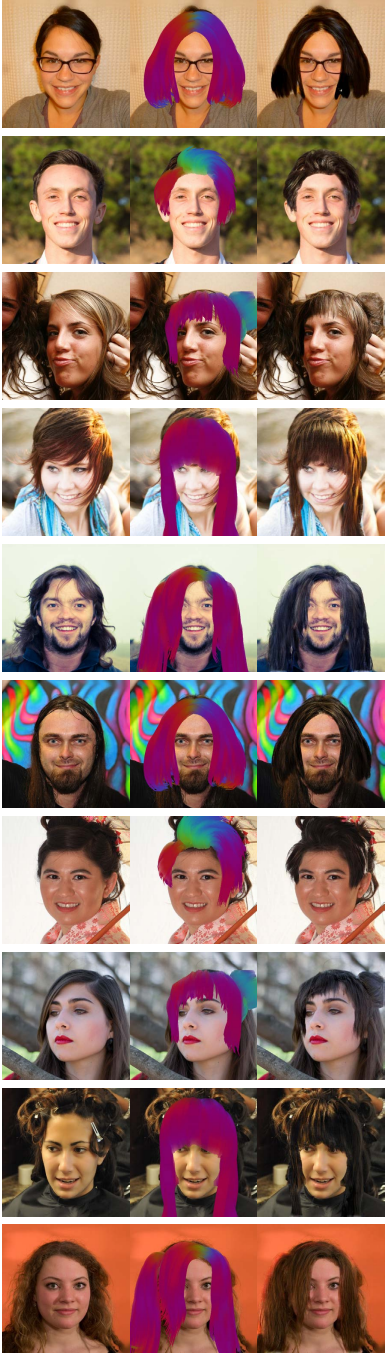

Input      Structure      Result

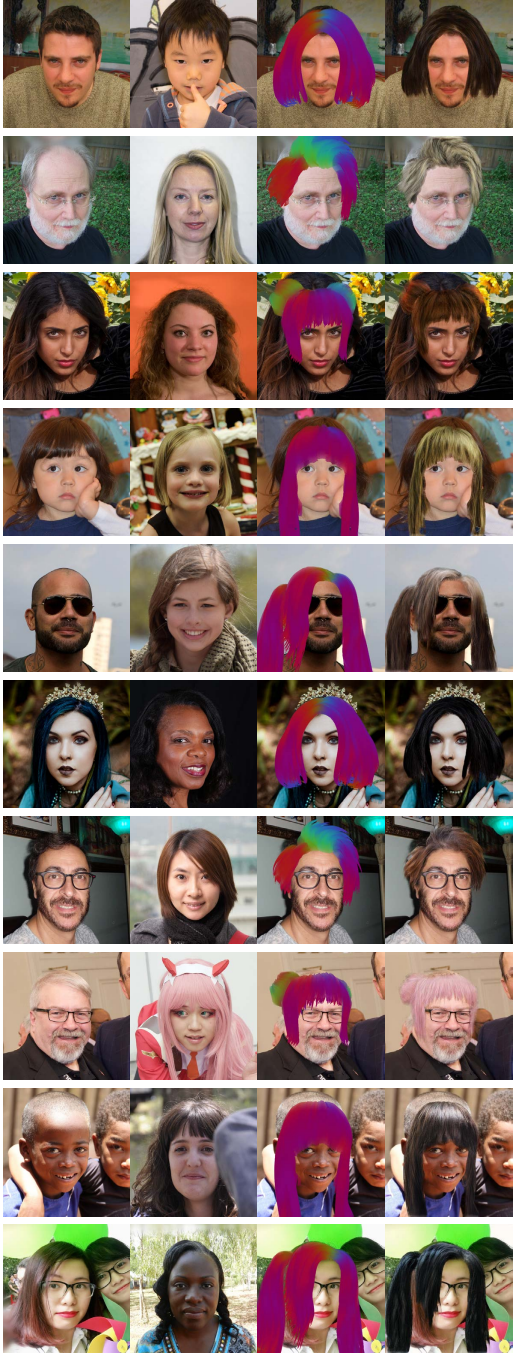

Input      Reference      Structure      Result

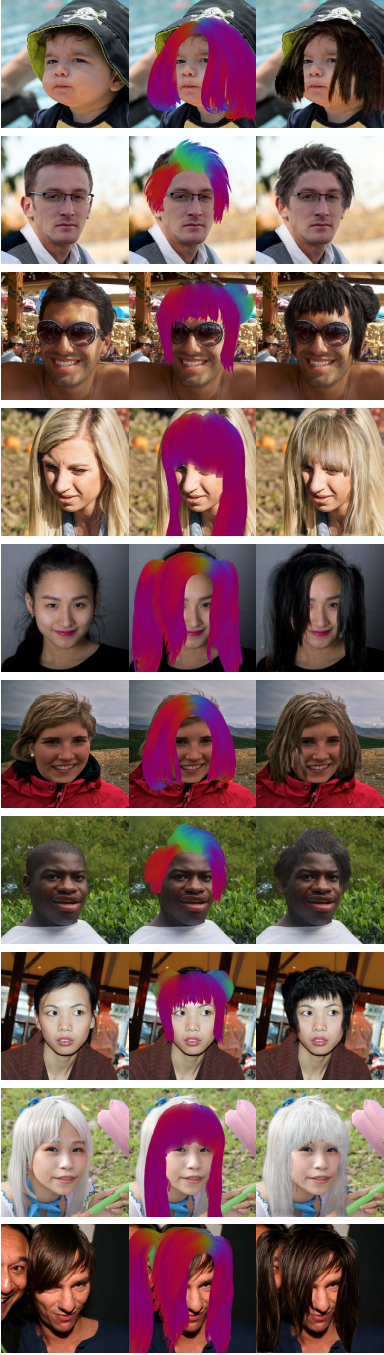

Input      Structure      Result

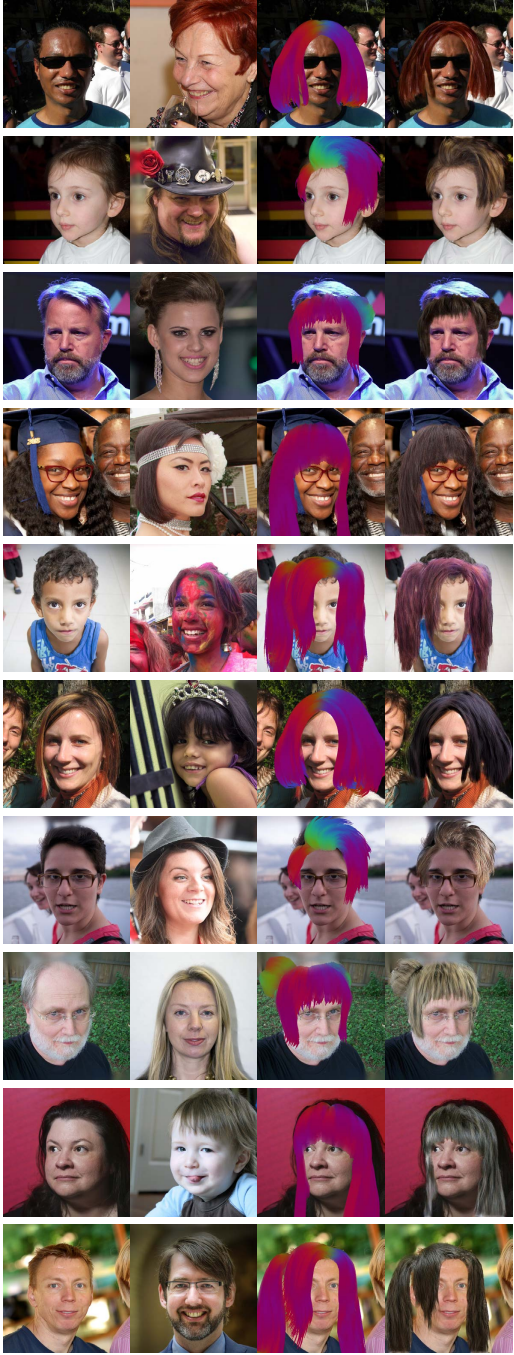

Input      Reference      Structure      Result
